# Supplementary material for: Neuroprotective Effects of Cryptotanshinone in a Direct Reprogramming Model of Parkinson’s Disease
Source: PubMed Central journal article supplement (PMC7463464; doi:10.3390/molecules25163602), 2020-08-07
Supplement: molecules-25-03602-s001.pdf [file molecules-25-03602-s001.pdf]

# Supplementary Material

**Table S1.** List of primer sequences used in this study.

| Target        | F/R | Sequences                   |
|---------------|-----|-----------------------------|
| NRF2          | F   | TCC AGT CAG AAA CCA GTG GAT |
|               | R   | GAA TGT CTG CGC CAA AAG CTG |
| SOD1          | F   | GAA GGT GTG GGG AAG CAT TA  |
|               | R   | ACA TTG CCC AAG TCT CCA AC  |
| PRX1          | F   | AAG AAA CTC AAC TGC CAA GTG |
|               | R   | CAG CCT TTA AGA CCC CAT AAT |
| PRX5          | F   | CCA ATC AAG ACA CAC CTG CC  |
|               | R   | TCT TGA GAC GTC GAT TCC CA  |
| GPX1          | F   | CCA AGC TCA TCA CCT GGT CT  |
|               | R   | TCG ATG TCA ATG GTC TGG AA  |
| NQO1          | F   | GGT GGA GTC GGA CCT CTA TG  |
|               | R   | ATA TCA CAA GGT CTG CGG CT  |
| PGC1 $\alpha$ | F   | GTC ACC ACC CAA ATC CTT AT  |
|               | R   | ATC TAC TGC CTG GAG ACC TT  |

**Table S2.** List of antibodies used in this study.

| Target                    | Vender                            | Catalog number | Dilution |
|---------------------------|-----------------------------------|----------------|----------|
| PAX6                      | Biologend                         | 901301         | 1:500    |
| SOX2                      | Millipore                         | MAB4343        | 1:200    |
| NESTIN                    | Biologend                         | 839801         | 1:200    |
| NRF2                      | Santa Cruz<br>Biotechnology, Inc. | sc-365949      | 1:100    |
| Cleaved CASP3<br>(Asp175) | Cell signaling<br>technology      | 9661           | 1:1000   |
| GAPDH                     | Santa Cruz<br>Biotechnology, Inc. | sc-47724       | 1:5000   |

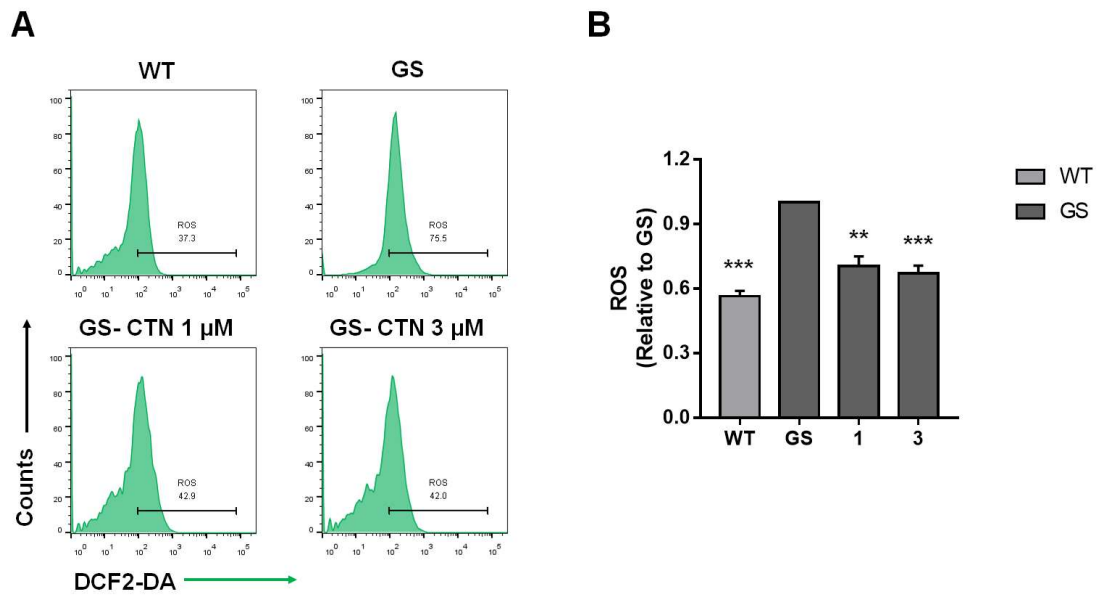

**Figure S1.** Evaluation of total ROS following CTN treatment under MG132-induced oxidative stress. (A) MG132-induced oxidative stress increases total ROS levels and restoration following CTN treatment as analyzed by DCF2DA-based flow cytometry. (B) Quantification of total ROS.
